# Supplementary material
Source: Springer Nature journal article supplement (https://www.springerprofessional.de/resource/supplementary/13673_2012_29_MOESM4_ESM.pdf/11899396)

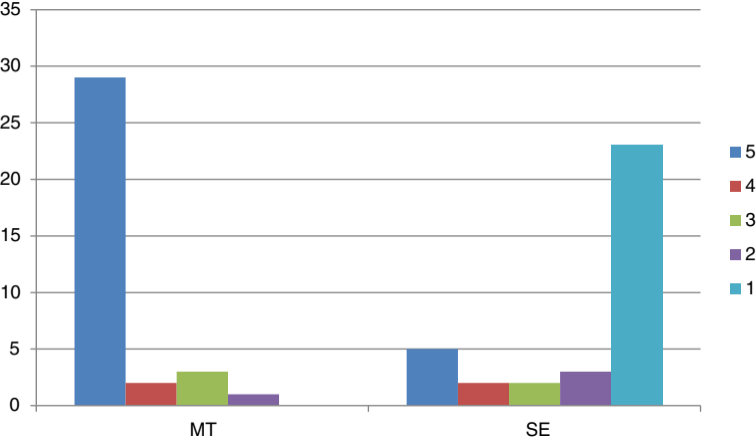

Supplement: MOESM4 [file 11899396]
